# Supplementary material for: Optimizing Amodiaquine Dosing in Nigeria: A Population Pharmacokinetic Study to Inform Seasonal Malaria Chemoprevention
Source: Research Square preprint supplement (doi:10.21203/rs.3.rs-6879693/v1), 2025-07-15
Supplement: Supplementary file 1 [file 3edc21a8aac9caa44befd732.docx]

**Supplementary Material Titles**

Figure S1 - Box Plots of Desethylamodiaquine Simulated Adult Day 7 Concentrations versus Weight

Figure S2 - Box Plots of Desethylamodiaquine Simulated Adult Maximum Concentrations versus Weight

Figure S3 - Box Plots of Desethylamodiaquine Simulated Paediatrics Day 7 Concentrations versus Weight

Figure S4 - Box Plots of Desethylamodiaquine Simulated Maximum Concentrations versus Weight
