# Supplementary material for: Optimizing Amodiaquine Dosing in Nigeria: A Population Pharmacokinetic Study to Inform Seasonal Malaria Chemoprevention
Source: Research Square preprint supplement (doi:10.21203/rs.3.rs-6879693/v1), 2025-07-15
Supplement: Supplementary file 2 [file 6686e2470a8031e6f333c46a.docx]

**Table 1. Study description**

| Characteristics | Study 1 (n=20) | Study 2 (n =14) | Total (n=34) |
| --- | --- | --- | --- |
| Sex, n (%)  Males | 100 (20/20) | 57.1 (8/14) | 82.4(28/34) |
| Females | 0 (0/20) | 42.9 (6/14) | 17.6 (6/34) |
| Age (years)  Mean | 25.4 | 24.8 | 25.2 |
| Median (Range) | 24 (20 – 34) | 24.5 (20 -29) | 24 (20 -34) |
| Mode | 20 | 26 | 24 |
| Weight (Kg)  Mean | 60.3 | 57.9 | 59.3 |
| Median (Range) | 59 (53 - 82) | 57 (53 – 65) | 58 (53 – 82) |
| Mode | 62 | 54 | 54 |
| Type of Formulation administered  AQ alone  AS + AQ (FDC) | No  Yes | Yes  No | 14/34 (41.2%)  20/34 (58.8%) |
