# Supplementary material for: Optimizing Amodiaquine Dosing in Nigeria: A Population Pharmacokinetic Study to Inform Seasonal Malaria Chemoprevention
Source: Research Square preprint supplement (doi:10.21203/rs.3.rs-6879693/v1), 2025-07-15
Supplement: Supplementary file 3 [file b33980dae938cb79f98bd9af.docx]

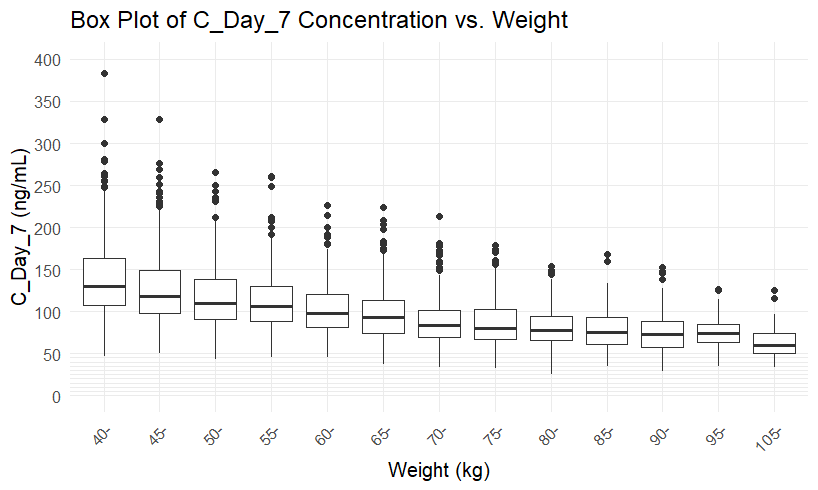


**Figure S1 - Box Plots of Desethylamodiaquine Simulated Adult Day 7 Concentrations versus Weight**


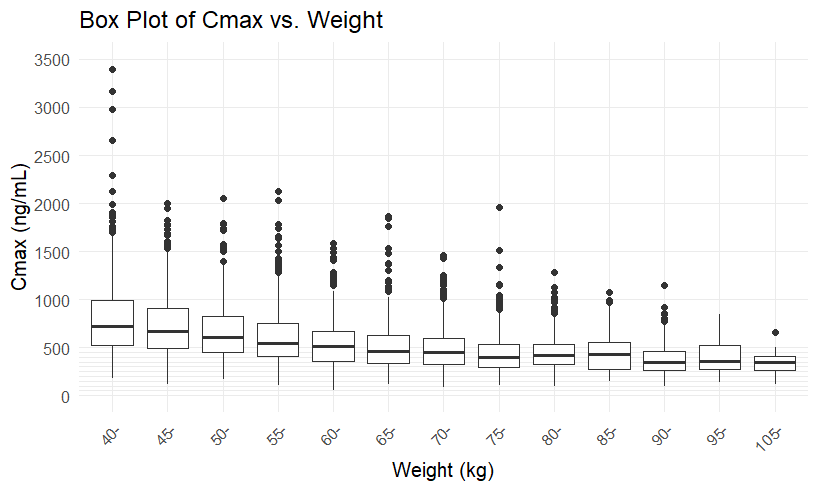


**Figure S2 - Box Plots of Desethylamodiaquine Simulated Adult Maximum Concentrations versus Weight**


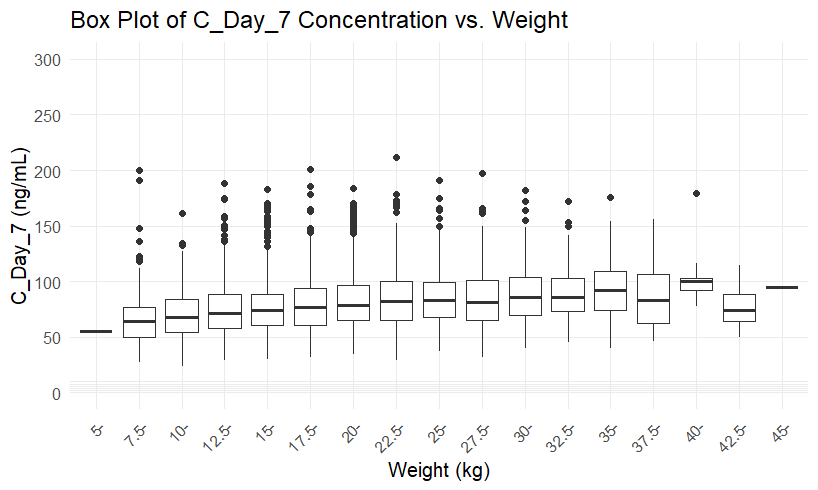


**Figure S3 - Box Plots of Desethylamodiaquine Simulated Paediatrics Day 7 Concentrations versus Weight**


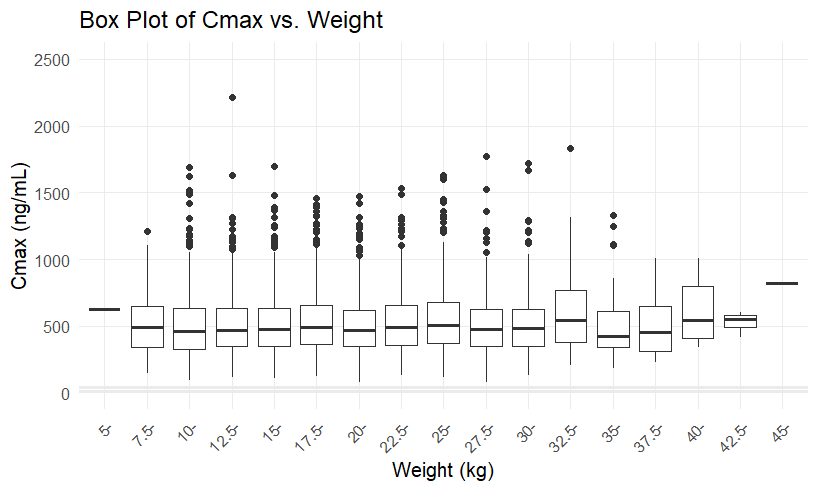


**Figure S4 - Box Plots of Desethylamodiaquine Simulated Maximum Concentrations versus Weight**
