# Supplementary material for: Optimizing Amodiaquine Dosing in Nigeria: A Population Pharmacokinetic Study to Inform Seasonal Malaria Chemoprevention
Source: Research Square preprint supplement (doi:10.21203/rs.3.rs-6879693/v1), 2025-07-15
Supplement: Supplementary file 4 [file cac06ae42454bc775969f1f8.docx]

Table S1 : Adult Virtual population using Nigeria Data

Table S 2: Paedratic Virtual population using World health Organization growth chart
